# Supplementary material for: Pliocene Ice Sheet Modelling Intercomparison Project (PLISMIP) – experimental design
Source: Copernicus journal article supplement (doi:10.5194/gmd-5-963-2012), 2012-07-18
Supplement: Supplementary file 1 [file gmd-5-963-2012-supplement.pdf]

## Supplementary information

### Pliocene Ice Sheet Modelling Intercomparison Project (PLISMIP) - experimental design

Aisling M. Dolan<sup>1</sup>, Sebastian J. Koenig<sup>2†</sup>, Daniel J. Hill<sup>3</sup>, Alan M. Haywood<sup>1</sup>, Robert M. DeConto<sup>2</sup>

<sup>1</sup> School of Earth and Environment, University of Leeds, Leeds, LS2 9JT, UK

<sup>2</sup> Department of Geosciences, University of Massachusetts, Amherst, MA 01003, USA

<sup>3</sup> British Geological Survey, Keyworth, Nottingham, NG12 5GG, UK

### Output Requirements

Participants are asked to provide spatial and temporal information from their ice sheet model as listed in Table S1. These data requirements represent the minimum contribution from each group. Participants are able to submit further fields of interest from their models to be considered in the analysis.

**Table S1.** Specification of output fields and data formats to be submitted as part of the Pliocene Ice Sheet Modelling Intercomparison Project.

| Name                         | Unit                                | Grid<br>(20km resolution) |            | Time-step |            |
|------------------------------|-------------------------------------|---------------------------|------------|-----------|------------|
|                              |                                     | Greenland                 | Antarctica | Greenland | Antarctica |
| Time                         | yrs                                 | 76 × 141                  | 334 × 334  | 100 yrs   | 1000 yrs   |
| Bed Elevation                | m                                   | 76 × 141                  | 334 × 334  | 100 yrs   | 1000 yrs   |
| Grounded Ice Sheet Thickness | m                                   | 76 × 141                  | 334 × 334  | 100 yrs   | 1000 yrs   |
| Grounded Ice Sheet Volume    | m <sup>3</sup>                      | 76 × 141                  | 334 × 334  | 100 yrs   | 1000 yrs   |
| Grounded Ice Sheet Area      | m <sup>2</sup>                      | 76 × 141                  | 334 × 334  | 100 yrs   | 1000 yrs   |
| Surface Mass Balance         | m yr <sup>-1</sup> water equivalent | 76 × 141                  | 334 × 334  | 100 yrs   | 1000 yrs   |
| Velocity                     | m yr <sup>-1</sup>                  | 76 × 141                  | 334 × 334  | 100 yrs   | 1000 yrs   |

Format should be NetCDF (preferred) or ASCII files.

Submission online at: [www.leeds.ac.uk/redmine/public/projects/plismip](http://www.leeds.ac.uk/redmine/public/projects/plismip) - please contact A. M. Dolan for access to this website.
